# Supplementary material for: Bioconcentration of cedarwood oil constituents in rainbow trout
Source: Royal Society of Chemistry journal article supplement (doi:10.1039/d1em00009h), 2021-01-01
Supplement: d1em00009h1.pdf [file d1em00009h1.pdf]

## Supporting Information

### Bioconcentration of cedarwood oil in rainbow trout

Roxana Sühning<sup>1</sup>, Chang'er L. Chen<sup>1,2</sup>, Michael S. McLachlan<sup>1</sup>, Matthew MacLeod<sup>1</sup>

<sup>1</sup>Department of Environmental Science and Analytical Chemistry (ACES), Stockholm University, Stockholm, Sweden

<sup>2</sup>Environmental Research Institute (ERI)/School of Environment, Guangdong Provincial Key Laboratory of Chemical Pollution and Environmental Safety & MOE Key Laboratory of Environmental Theoretical Chemistry, South China Normal University, Guangzhou, 510006, China

\*corresponding author: Roxana Suehring; current affiliation: Ryerson University, 350 Victoria St, Toronto, ON M5B 2K3; email: [Roxana.suehring@ryerson.ca](mailto:Roxana.suehring@ryerson.ca)

#### **Summary:**

Pages: 16

No. of Tables: 4

No. of Figures: 5

## 1. The bioconcentration factor

The bioconcentration factor (BCF) describes the ratio of chemical concentration in an organism's body (usually fish) ( $C_B$ ) [ $\text{mol kg}^{-1}$ ] and the concentration of freely dissolved chemical in water ( $C_{WD}$ ) [ $\text{mol L}^{-1}$ ] at steady state (OECD, 2012). Kinetically the BCF can be expressed as the ratio of the uptake rate constant ( $k_1$ ) [ $\text{L kg}^{-1} \text{d}^{-1}$ ] and the total elimination or depuration rate constant ( $k_T$ ) [ $\text{d}^{-1}$ ].

The BCF [ $\text{L kg}^{-1}$ ] is calculated as

$$BCF = \frac{C_B}{C_{WD}} = \frac{k_1}{k_T} \quad (1)$$

The total depuration rate constant ( $k_T$ ) [ $\text{d}^{-1}$ ] is a sum parameter of the different elimination processes that can occur in a fish, i.e. excretion ( $k_E$ ) [ $\text{d}^{-1}$ ], elimination through respiration ( $k_2$ ) [ $\text{d}^{-1}$ ], metabolic biotransformation ( $k_M$ ) [ $\text{d}^{-1}$ ], and growth dilution ( $k_G$ ) [ $\text{d}^{-1}$ ].

$$k_T = k_E + k_2 + k_M + k_G \quad (2)$$

In a BCF experiment in which the concentrations of the target analytes ( $C_X$ ) are measured at different time points ( $t$ ) throughout the elimination process, the total depuration rate constant can be calculated as follows (Arnot and Gobas, 2004):

$$k_T = \frac{\ln C_{X,t2} - \ln C_{X,t1}}{t2 - t1} \quad (3)$$

In the presented study, we used an abbreviated dietary exposure experiment with internal benchmarking to determine the depuration rate constant and derive the BCF for cedarwood oil constituents in rainbow trout. Using a single feeding event meant that the duration of the experiment and number of test animals could be reduced compared to a standard OECD 305 test because the time and testing during the uptake phase were eliminated. On the other hand, the uptake rate constant ( $k_1$ ) could not be measured in this test set up and had, instead, to be estimated.

## 2. Estimating the uptake rate constant ( $k_1$ )

The OECD 305 recommends a model proposed by Arnot and Gobas (2004) as one of the suitable methods to estimate  $k_1$ . In previous studies we also found that the Arnot and Gobas (2004)  $k_1$  model results in a good agreement of derived BCFs for neutral hydrophobic substances with respective BCFs measured in standard regulatory test set ups reported in the literature (Chen et al. 2018).

The uptake rate  $k_1$  [ $\text{L kg}^{-1} \text{d}^{-1}$ ] based on the Arnot and Gobas (2004) model is calculated with

$$k_1 = \frac{E_W \times G_V}{W} \quad (4)$$

where  $E_W$  is the chemical transfer efficiency at the gill [unit less],  $G_V$  is the gill ventilation rate [ $\text{l d}^{-1}$ ], and  $W$  is the wet weight of the fish [kg].

According to Gobas and Mackay (1987),  $E_W$  is calculated as

$$E_W = \left( R_{WW} + \frac{R_{LW}}{K_{OW}} \right)^{-1} \quad (5)$$

Where  $R_{ww}$  is the diffusive resistance in the water phase (approx. 1.88),  $R_{lw}$  is the diffusive resistance in the lipid phase (approx. 155) and  $K_{ow}$  is the octanol-water partitioning coefficient of the test substance.

The gill ventilation rate  $G_v$  can be calculated as

$$G_v = \frac{M}{E_{ox} \times C_{ox}} \quad (6)$$

Where  $M$  is the metabolic oxygen requirement of the fish [ $\text{mg d}^{-1}$ ],  $C_{ox}$  is the dissolved oxygen concentration in water [ $\text{mg l}^{-1}$ ] ( $7 \text{ mg l}^{-1}$  in this experiment), and  $E_{ox}$  is oxygen transfer efficiency across the gills (approx. 0.65, according to Arnot et al. 2008).

$M$  can be calculated as

$$\log_{10} M = 2.8 + 0.786 \log_{10} W + 0.017 T \quad (7)$$

With  $W$ : fish weight [ $\text{kg}$ ] and  $T$ : Temperature [ $^{\circ}\text{C}$ ] ( $10^{\circ}\text{C}$  in this study).

Based on equations 4-7  $k_1$  can be calculated as

$$k_1 = \frac{10^{2.8 + 0.786 \log_{10} W + 0.017 T}}{0.65 W \left( 1.85 + \frac{155}{K_{ow}} \right) C_{ox}} \quad (8)$$

For hydrophobic substances ( $K_{ow} > 1000$ ) the term  $1.85 + \frac{155}{K_{ow}}$  approaches 1.85.

Therefore,

$$k_1 = \frac{10^{2.8 + 0.786 \log_{10} W + 0.017 T}}{0.65 W * 1.85 C_{ox}} \quad (9)$$

For a specific experiment,  $C_{ox}$ ,  $W$  and  $T$  are the same for all test chemicals. Therefore,  $k_1$  can be approximated as a constant for high  $K_{ow}$  substances analysed in the same experiment (Chen et al., 2018).

The OECD 305 (2012) advises against the use of a bioavailability correction factor for the estimated  $k_1$  in dietary exposure studies on hydrophobic substances. In accordance with these recommendations, no correction factor was applied in the  $k_1$  estimates.

## 2.1 Validity and uncertainty of $k_1$ estimates

An important assumption for the estimation of  $k_1$  is that  $k_1$  is equal for all test and benchmark substances. Therefore, an additional important assumption is that the uncertainty of  $k_1$  is equal for all test substances and benchmark substances as well. The reasoning for this assumption is that the parameters that determine the uncertainty of  $k_1$  are independent of the differences in physical-chemical properties for the chosen test and benchmark substances.

These assumptions are valid for test substances and benchmark substances that are hydrophobic

with  $K_{OW} > 1000$ . For high  $K_{OW}$  substances the term  $1.85 + \frac{155}{K_{OW}}$  in equation 8 approaches 1.85. The other determinants of  $k_1$ , fish weight (W), water temperature (T) and the dissolved oxygen concentration ( $C_{Ox}$ ), are independent of the properties of the test chemicals. The uncertainty associated with these parameters affects all test and benchmark chemicals equally and can be minimized by controlling the growth rate, water temperature and dissolved oxygen concentration in the water. Because the uncertainty is the same for all test and benchmark chemicals, it does not impact the relative magnitude of the derived BCFs between chemicals, even if the absolute values of the BCFs are subject to the uncertainty introduced by estimating  $k_1$ . To address the uncertainty in the absolute value of the BCF, threshold benchmarking (discussed in section 3.1. below) as well as the literature comparison were used.

### 3. Using internal benchmarking in an abbreviated in-vivo dietary exposure BCF study

The dietary exposure approach outlined in the updated OECD 305 test guideline has been criticised for the variability in the quality of the proposed approaches to estimate  $k_1$  which can lead to significant differences in the derived BCFs (Crookes and Brooke, 2011). For the presented abbreviated test set up with a single dietary exposure event, inter-individual variability presents another challenge, because of differences in e.g. feeding behaviour of the fish on the day of exposure which could lead to considerable differences in the exposure of each individual fish.

Both the inter-individual variability in dietary exposure BCF studies and the correct choice of a model to estimate  $k_1$  can be addressed through internal benchmarking.

Benchmarking in BCF experiments is similar to the use of so-called internal standards in analytical chemistry: concentrations of target analytes are measured relative to the concentrations of a well-characterized standard with a known behaviour in the test system. I.e. the depuration rate  $k_T$  of a target analyte (change in concentration ( $dC$ ) over time ( $dt$ )) is measured relative to the change of the concentration of the benchmark substance ( $dC_{BM}$ ) over time resulting in a benchmarked depuration rate constant  $k_{TBM}$ :

$$\frac{dC}{dt} \Rightarrow \frac{d\left(\frac{C}{C_{BM}}\right)}{dt} = k_{TBM} \quad (10)$$

In the presented study, we use this benchmarking concept in two ways: 1. **conservative benchmarking** and 2. **threshold benchmarking**.

#### 3.1 Conservative benchmarking

Conservative benchmarking is used to control for the inter-individual variability of target analyte concentrations in fish, due to e.g. differences in feeding behaviour and growth rate during the BCF experiment.

The target analytes and benchmark substances were fed to the fish at the same time to ensure the respective concentrations would be subject to the same sources of inter-individual variability. Analogue to the calculation of the depuration rate constant for the target analytes (equation 3), the depuration rate constants of the conservative benchmarking substances ( $k_G$ ) can be calculated as:

$$k_{TCBM} = k_G = \frac{\ln C_{CBM,t2} - \ln C_{CBM,t1}}{t2 - t1} \quad (11)$$

where  $C_{CBM}$  is the measured concentration of the conservative benchmarking substance (CBM) at time  $t$ .

Only substances that are not be eliminated by exhalation ( $k_2$ ), metabolism ( $k_M$ ), or excretion ( $k_E$ ) within the timeframe of the experiment were selected as conservative benchmark substances. Therefore, the depuration rate constant for the conservative benchmarking substances ( $k_{TCBM}$ ) is assumed to be equal to the depuration rate constant for growth dilution of the fish used in the experiment ( $k_G$ ).

The inter-individual variability and growth-corrected depuration rate constant  $k_{TG}$  of target analytes in an experiment with conservative benchmarking substances can then be calculated as (Chen et al., 2018):

$$k_{TG} = k_T - k_G = \frac{\ln\left(\frac{C_{X,t2}}{C_{CBM,t2}}\right) - \ln\left(\frac{C_{X,t1}}{C_{CBM,t1}}\right)}{t2 - t1} \quad (12)$$

where  $C_X$  is the measured concentration of the test substance X at time  $t$ . Since the experiment has multiple sampling time points,  $k_{TG}$  is obtained from a linear regression of the natural logarithm of the benchmarked test substance concentration against time.

Using an estimated uptake rate constant ( $k_1$ ) (equation 9) the conservative benchmarked BCF ( $BCF_{CBM}$ ) can be calculated as:

$$BCF_{CBM} = \frac{k_1}{k_{TG}} \quad (13)$$

The OECD 305 test guideline recommends the use of growth correction in the calculation of a dietary exposure BCF. The  $BCF_{CBM}$  presented here corrects for growth-dilution as well as additional sources of inter-individual variability due to e.g. differences in feeding behaviour. It is a growth-corrected dietary exposure BCF as defined by the OECD 305 test guideline.

### 3.2 Threshold benchmarking

Threshold benchmarking is used to screen a dataset for substances that likely meet or do not meet the B or vB criteria. In threshold benchmarking, the depuration rate constant of the target analytes is calculated relatively to the depuration rate constant of a known B or vB threshold benchmarking substance. The threshold benchmarked depuration rate constant ( $k_{TBM}$ ) is calculated as:

$$k_{TBM} = \frac{\ln\left(\frac{C_{X,t2}}{C_{TBM,t2}}\right) - \ln\left(\frac{C_{X,t1}}{C_{TBM,t1}}\right)}{t2 - t1} \quad (14)$$

where  $C_X$  and  $C_{TBM}$  are the measured concentrations of test substance X and threshold benchmark substance (TBM) at time  $t$ , respectively. Analogous to the calculation of  $k_{TG}$ ,  $k_{TBM}$  is obtained from a linear regression of the natural logarithm of the threshold benchmarked test substance concentration against time for experiments with multiple sampling time points.

If  $k_{TBM} > 0$ , the target analyte is eliminated slower from the organism than the threshold benchmarking substance, if  $k_{TBM} < 0$  the target analyte is eliminated faster from the organism than the threshold benchmarking substance.

Threshold benchmarking has the advantage that the potential transgression of a regulatory threshold for bioaccumulation potential can be assessed based on the measured depuration rate constants alone- without the need to estimate  $k_{1-}$  as well as based on derived BCFs.

### 3.3 Standard error and confidence intervals

The standard error of the mean depuration rate constant ( $k_T$ ) and benchmarked depuration rate constant ( $k_{TG}$ ) were calculated with

$$SE = \frac{\sigma}{\sqrt{n}} \quad (15)$$

with  $\sigma$  being the sample standard deviation and  $n$  being the number of samples.

The 90 % confidence interval was calculated by calculating the 5<sup>th</sup> and 95<sup>th</sup> confidence level as

$$5^{\text{th}} = \text{Mean} - SE \times 1.96 \quad (16)$$

and

$$95^{\text{th}} = \text{Mean} + SE \times 1.96 \quad (17)$$

where “Mean” refers to the mean  $k_T$  or  $k_{TG}$ , respectively.

Confidence intervals for the bioconcentration factor (BCF) and benchmarked bioconcentration factor ( $BCF_{BM}$ ) were calculated from the 5<sup>th</sup> and 95<sup>th</sup> confidence level of  $k_T$  and  $k_{TG}$ , respectively using equation (1). It should be noted that depuration rate constants with a slope of 0 result in an undeterminable BCF. In this case, the BCF has been reported as > the median value.

**Table S1.** CAS, molecular weight (MW) [ $\text{g mol}^{-1}$ ],  $\log K_{ow}$ , quantification ion (Quant ion), confirmation ions (Conf ions), retention time (RT) [min], and used isotope-labelled standard for GC-MS analysis of target analytes and benchmark substances

| Target              | CAS        | MW     | $\log K_{ow}^*$ | Quant ion | Conf ions | RT    | IS    | Structure                                                                             |
|---------------------|------------|--------|-----------------|-----------|-----------|-------|-------|---------------------------------------------------------------------------------------|
| $\alpha$ -Funebrene | 50894-66-1 | 204.35 | 5.74            | 119       | 105, 93   | 14.86 | AC-d4 | 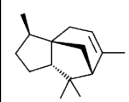 |
| $\alpha$ -Cedrene   | 469-61-4   | 204.35 | 5.74            | 119       | 105, 93   | 15.34 | AC-d4 |  |
| $\beta$ -Cedrene    | 546-28-1   | 204.35 | 5.82            | 93        | 105, 91   | 15.44 | AC-d4 |  |
| Thujopsene          | 470-40-6   | 204.35 | 6.12            | 119       | 105, 133  | 15.57 | AC-d4 |  |

|                                  |            |        |      |     |          |       |         |                                                                                       |
|----------------------------------|------------|--------|------|-----|----------|-------|---------|---------------------------------------------------------------------------------------|
| Cuparene                         | 16982-00-6 | 202.34 | 6.19 | 132 | 119, 91  | 16.47 | AC-d4   | 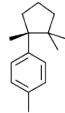   |
| Cedrol                           | 77-53-2    | 222.37 | 4.33 | 95  | 150, 81  | 17.75 | AC-d4   |    |
| Widdrol                          | 6892-80-4  | 222.37 | 4.84 | 95  | 151      | 17.75 | AC-d4   |    |
| <b>Benchmark</b>                 |            |        |      |     |          |       |         |                                                                                       |
| Trichlorobenzene                 | 108-70-3   | 181.45 | 4.02 | 180 | 145      | 11.85 | 13C-HCB |    |
| Pentachlorobenzene               | 608-93-5   | 250.33 | 5.17 | 250 | 108, 215 | 16.52 | 13C-HCB |    |
| Hexachlorobenzene                | 118-74-1   | 284.80 | 5.73 | 284 | 286      | 18.76 | 13C-HCB |    |
| <b>Isotope-labelled standard</b> |            |        |      |     |          |       |         |                                                                                       |
| d4-Acetyl-cedrene                | n.a.       | 250.40 | n.a. | 250 | 252      | 19.44 | n.a.    |                                                                                       |
| 13C-HCB                          | n.a.       | 290.00 | n.a. | 290 | 292      | 18.80 | n.a.    |                                                                                       |
| <b>Injection standard</b>        |            |        |      |     |          |       |         |                                                                                       |
| 2,2',5,6'-PCB                    | 41464-41-9 | 291.99 | 6.09 | 220 | 292      | 20.74 | n.a.    |  |

\*predicted by EPISuite v.4.11

**Table S2.** Characterisation of Cedarwood oil batch AS00254371 (compounds with ~1% or more contribution to the total chromatogram area (% Total))

| Constituent          | CAS #              | % Total | Normalised on 100% | Notes                                     |
|----------------------|--------------------|---------|--------------------|-------------------------------------------|
| $\alpha$ -Cedrene    | 469-61-4           | 26      | 32                 |                                           |
| Cedrol/Widdrol       | 77-53-2/ 6892-80-4 | 22      | 28                 |                                           |
| Thujopsene           | 470-40-6           | 19      | 24                 |                                           |
| $\beta$ -Cedrene     | 546-28-1           | 3.9     | 4.8                |                                           |
| Cuparene             | 16982-00-6         | 3.0     | 3.8                |                                           |
| $\beta$ -Himachalene | 1461-03-6          | 1.9     | 2.4                | Could not be detected in the fish samples |
| Sesquiterpene        |                    | 1.5     | 1.9                |                                           |
| $\beta$ -Chamigrene  | 18431-82-8         | 1.4     | 1.7                | Could not be detected in the fish samples |
| Sesquiterpene        |                    | 0.94    | 1.2                |                                           |

|                     |            |      |      |                                           |
|---------------------|------------|------|------|-------------------------------------------|
| $\beta$ -Funebrene  | 79120-98-2 | 0.75 | 0.94 | Could not be detected in the fish samples |
| $\alpha$ -Funebrene | 50894-66-1 | 0.68 | 0.85 |                                           |



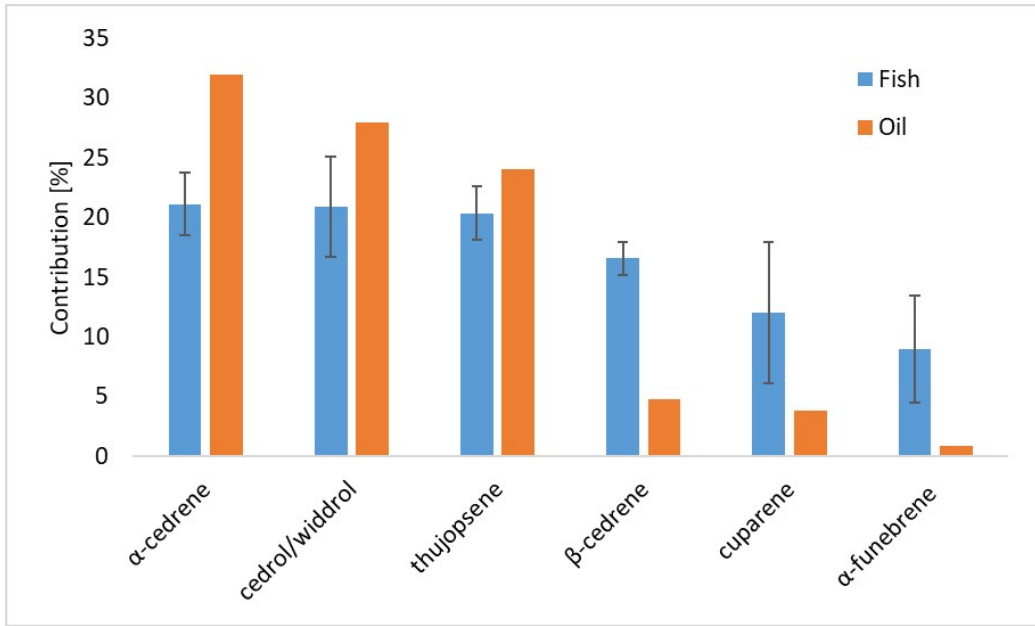

**Figure S1.** Contribution [%] of individual Cedarwood oil constituents in the pure oil sample (orange) and exposed rainbow trout sampled at day 1 of the experiment (blue).

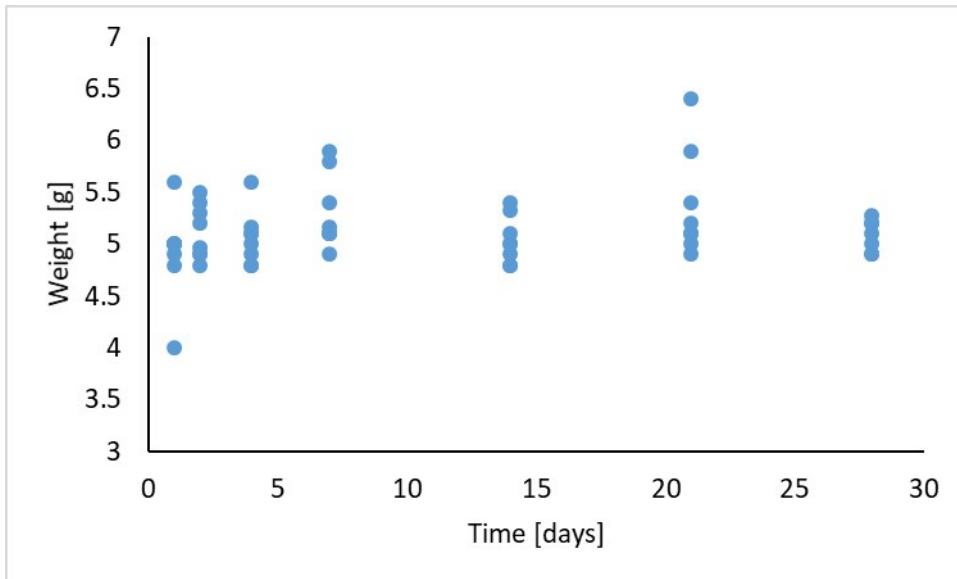

**Figure S2.** Weight [g] of the tested fish.

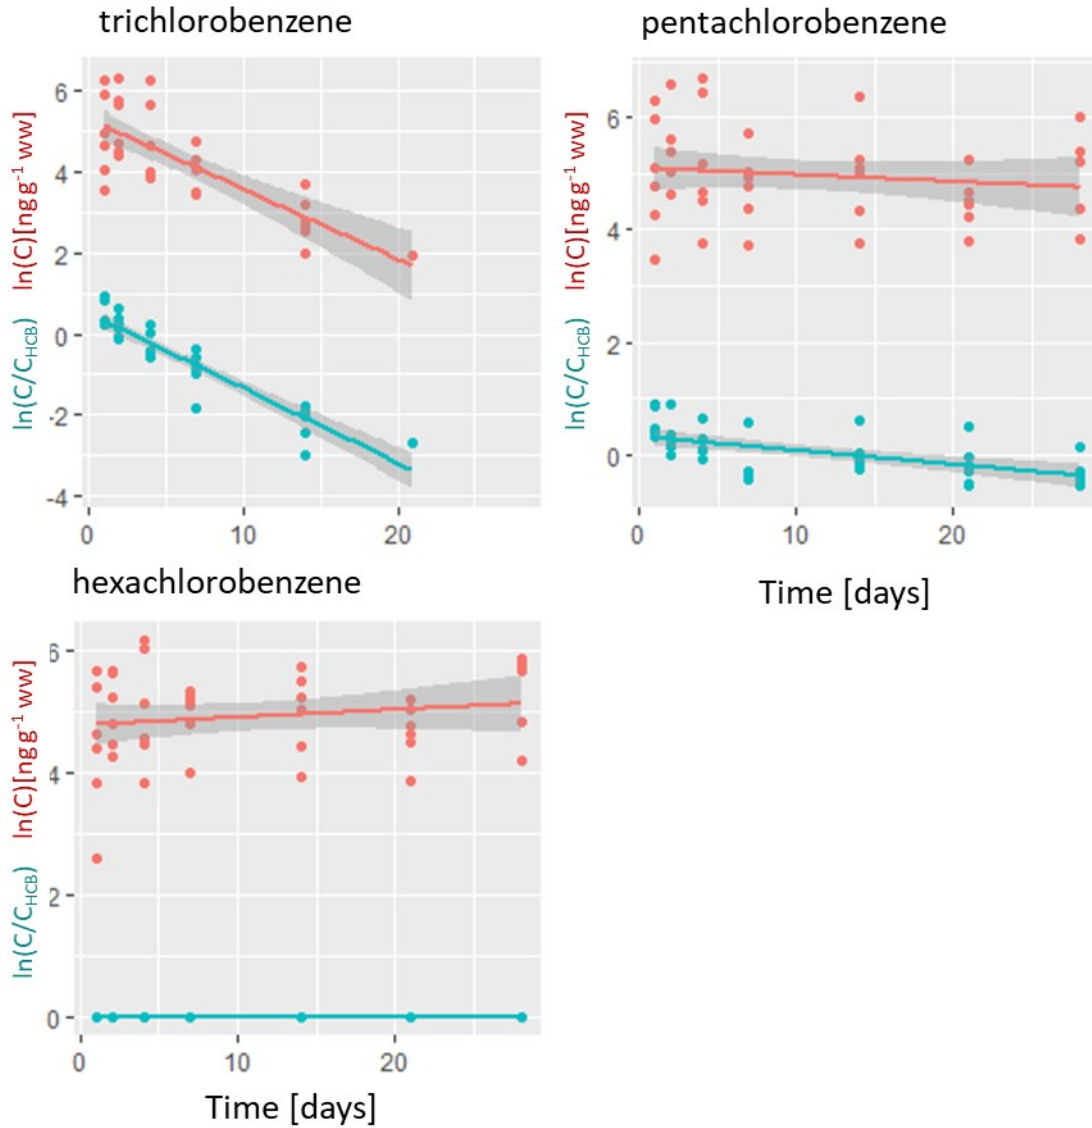

**Figure S3.** Depuration kinetics for the benchmark substances plotted as the natural logarithm ( $\ln$ ) of the measured concentrations for TrCB, PeCB, and HCB, respectively [ $\text{ng g}^{-1} \text{ww}$ ] (orange) and the  $\ln$  target analyte concentrations benchmarked with HCB (blue) against the time [days].

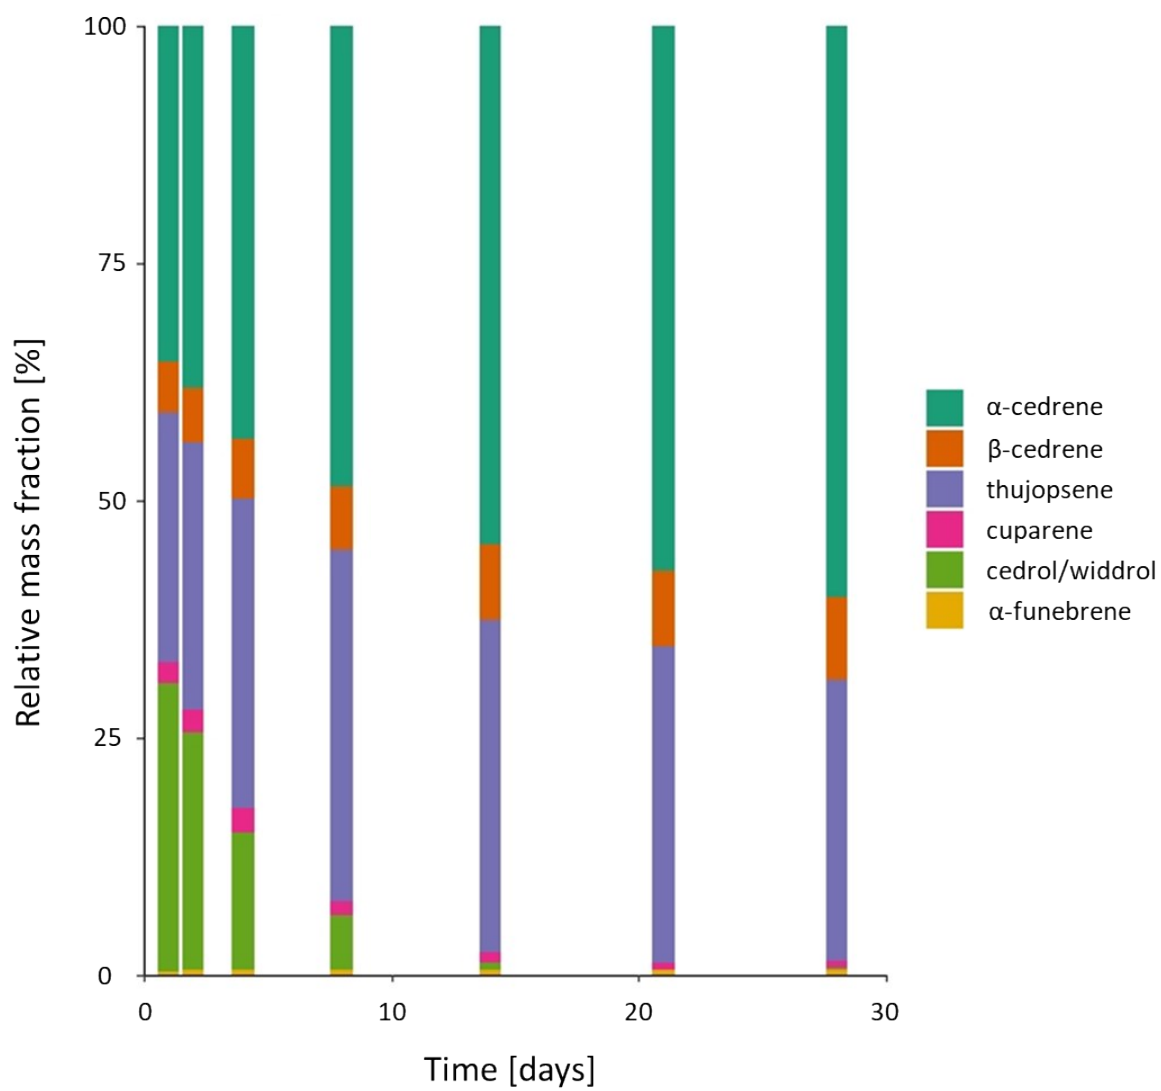

**Figure S4.** Contribution of the main Cedarwood oil constituents at different sampling days.

**Table S3.** Concentrations [ $\mu\text{g g}^{-1}$  ww] of target analytes and benchmarks substances in individual fish

| Fish No | Day | Fish weight [g] | $\alpha$ -Cedrene | $\beta$ -Cedrene | Thujopsene | Cuparene | Cedrol/Widdrol | $\alpha$ -Funebrene | TrCB  | PeCB  | HCB   |
|---------|-----|-----------------|-------------------|------------------|------------|----------|----------------|---------------------|-------|-------|-------|
| 1       | 1   | 83              | 4.7               | 0.67             | 3.1        | <LOQ     | 2.4            | <LOQ                | 0.058 | 0.070 | 0.045 |
| 2       | 1   | 101             | 0.82              | 0.14             | 0.56       | <LOD     | 1.8            | <LOD                | 0.035 | 0.033 | 0.014 |
| 3       | 1   | 104             | 7.2               | 1.1              | 5.7        | 0.40     | 5.7            | <LOQ                | 0.10  | 0.12  | 0.082 |
| 4       | 1   | 124             | 10                | 1.5              | 7.5        | 0.79     | 7.8            | 0.15                | 0.14  | 0.16  | 0.10  |
| 5       | 1   | 95              | 28                | 4.3              | 20         | 2.8      | 26             | 0.42                | 0.36  | 0.40  | 0.29  |
| 5-2     | 1   | 95              | 36                | 5.3              | 29         | 2.7      | 16             | 0.47                | 0.51  | 0.54  | 0.22  |
| 1       | 2   | 79              | 7.3               | 1.1              | 5.2        | 0.39     | 3.9            | <LOQ                | 0.080 | 0.10  | 0.087 |
| 2       | 2   | 66              | 23                | 3.7              | 18         | 2.5      | 22             | 0.31                | 0.31  | 0.27  | 0.27  |
| 3       | 2   | 98              | 5.2               | 0.77             | 3.8        | <LOQ     | 4.0            | <LOQ                | 0.087 | 0.10  | 0.071 |
| 4       | 2   | 36              | 15                | 2.3              | 11         | 0.82     | 14             | 0.17                | 0.28  | 0.22  | 0.19  |
| 5       | 2   | 42              | 11                | 1.6              | 7.9        | 0.67     | 5.7            | 0.13                | 0.11  | 0.15  | 0.12  |
| 2-2     | 2   | 66              | 44                | 6.4              | 32         | 2.6      | 15             | 0.65                | 0.54  | 0.72  | 0.29  |
| 1       | 4   | 164             | 37                | 5.7              | 29         | 2.3      | 14             | 0.66                | 0.29  | 0.63  | 0.47  |
| 2       | 4   | 72              | 7.5               | 1.1              | 5.5        | <LOQ     | 1.9            | <LOQ                | 0.055 | 0.092 | 0.085 |
| 3       | 4   | 108             | 13                | 1.9              | 11         | 0.86     | 4.2            | 0.17                | 0.10  | 0.18  | 0.17  |
| 4       | 4   | 120             | 3.4               | 0.48             | 2.6        | <LOQ     | 1.8            | <LOD                | 0.048 | 0.042 | 0.046 |
| 5       | 4   | 103             | 6.4               | 0.87             | 3.9        | <LOQ     | 1.8            | <LOQ                | 0.054 | 0.11  | 0.095 |
| 1-2     | 4   | 164             | 51                | 7.6              | 43         | 3.6      | 14             | 0.84                | 0.51  | 0.80  | 0.41  |
| 1       | 7   | 206             | 15                | 2.2              | 11         | 0.42     | 0.53           | 0.16                | 0.033 | 0.15  | 0.21  |
| 2       | 7   | 168             | 4.2               | 0.56             | 2.8        | <LOD     | 0.60           | <LOQ                | 0.031 | 0.041 | 0.054 |
| 3       | 7   | 65              | 7.7               | 1.1              | 6.0        | <LOQ     | 1.3            | <LOQ                | 0.056 | 0.079 | 0.12  |
| 4       | 7   | 108             | 13                | 1.8              | 10         | 0.56     | 1.4            | 0.16                | 0.061 | 0.12  | 0.16  |
| 5       | 7   | 113             | 16                | 2.1              | 13         | 0.64     | 1.9            | 0.19                | 0.075 | 0.13  | 0.18  |
| 1-2     | 7   | 206             | 14                | 2.0              | 11         | 0.61     | 1.8            | 0.22                | 0.12  | 0.31  | 0.17  |
| 1       | 14  | 73              | 15                | 2.2              | 10         | 0.43     | <LOQ           | 0.17                | 0.016 | 0.15  | 0.18  |
| 2       | 14  | 52              | 4.8               | 0.71             | 3.1        | <LOD     | <LOQ           | <LOQ                | 0.014 | 0.077 | 0.083 |
| 3       | 14  | 98              | 16                | 2.4              | 9.3        | <LOQ     | <LOQ           | 0.16                | 0.012 | 0.19  | 0.24  |
| 4       | 14  | 93              | 10                | 1.4              | 4.8        | <LOQ     | <LOQ           | <LOQ                | 0.024 | 0.16  | 0.15  |
| 5       | 14  | 52              | 2.6               | 0.37             | 2.1        | <LOD     | <LOQ           | <LOD                | <LOQ  | 0.043 | 0.050 |
| 3-2     | 14  | 98              | 30                | 4.3              | 20         | 0.80     | 0.21           | 0.42                | 0.041 | 0.58  | 0.31  |
| 1       | 21  | 97              | 10                | 1.4              | 5.1        | <LOQ     | <LOD           | <LOQ                | <LOD  | 0.091 | 0.15  |
| 2       | 21  | 115             | 12                | 1.7              | 5.3        | <LOQ     | <LOD           | 0.13                | <LOD  | 0.11  | 0.18  |
| 3       | 21  | 107             | 6.4               | 0.91             | 3.8        | <LOD     | <LOD           | <LOQ                | <LOQ  | 0.086 | 0.10  |
| 4       | 21  | 138             | 5.9               | 0.83             | 4.3        | <LOD     | <LOD           | <LOQ                | <LOD  | 0.068 | 0.090 |
| 5       | 21  | 186             | 2.4               | 0.35             | 1.5        | <LOD     | <LOD           | <LOD                | <LOD  | 0.045 | 0.047 |
| 3-2     | 21  | 115             | 8.7               | 1.2              | 5.1        | <LOQ     | <LOD           | 0.13                | 0.012 | 0.19  | 0.12  |
| 1       | 28  | 99              | 17                | 2.6              | 8.2        | <LOQ     | <LOQ           | 0.18                | <LOD  | 0.22  | 0.30  |
| 2       | 28  | 30              | 21                | 3.2              | 8.5        | <LOQ     | <LOQ           | 0.17                | <LOD  | 0.22  | 0.29  |
| 3       | 28  | 66              | 27                | 3.9              | 15         | <LOQ     | <LOQ           | 0.33                | <LOD  | 0.18  | 0.31  |
| 4       | 28  | 185             | 3.2               | 0.45             | 1.2        | <LOD     | <LOD           | <LOD                | <LOD  | 0.046 | 0.07  |
| 5       | 28  | 118             | 8.0               | 1.1              | 5.1        | <LOQ     | <LOD           | <LOQ                | <LOD  | 0.079 | 0.13  |
| 3-3     | 28  | 66              | 36                | 5.1              | 19         | 0.39     | <LOQ           | 0.45                | <LOD  | 0.41  | 0.35  |

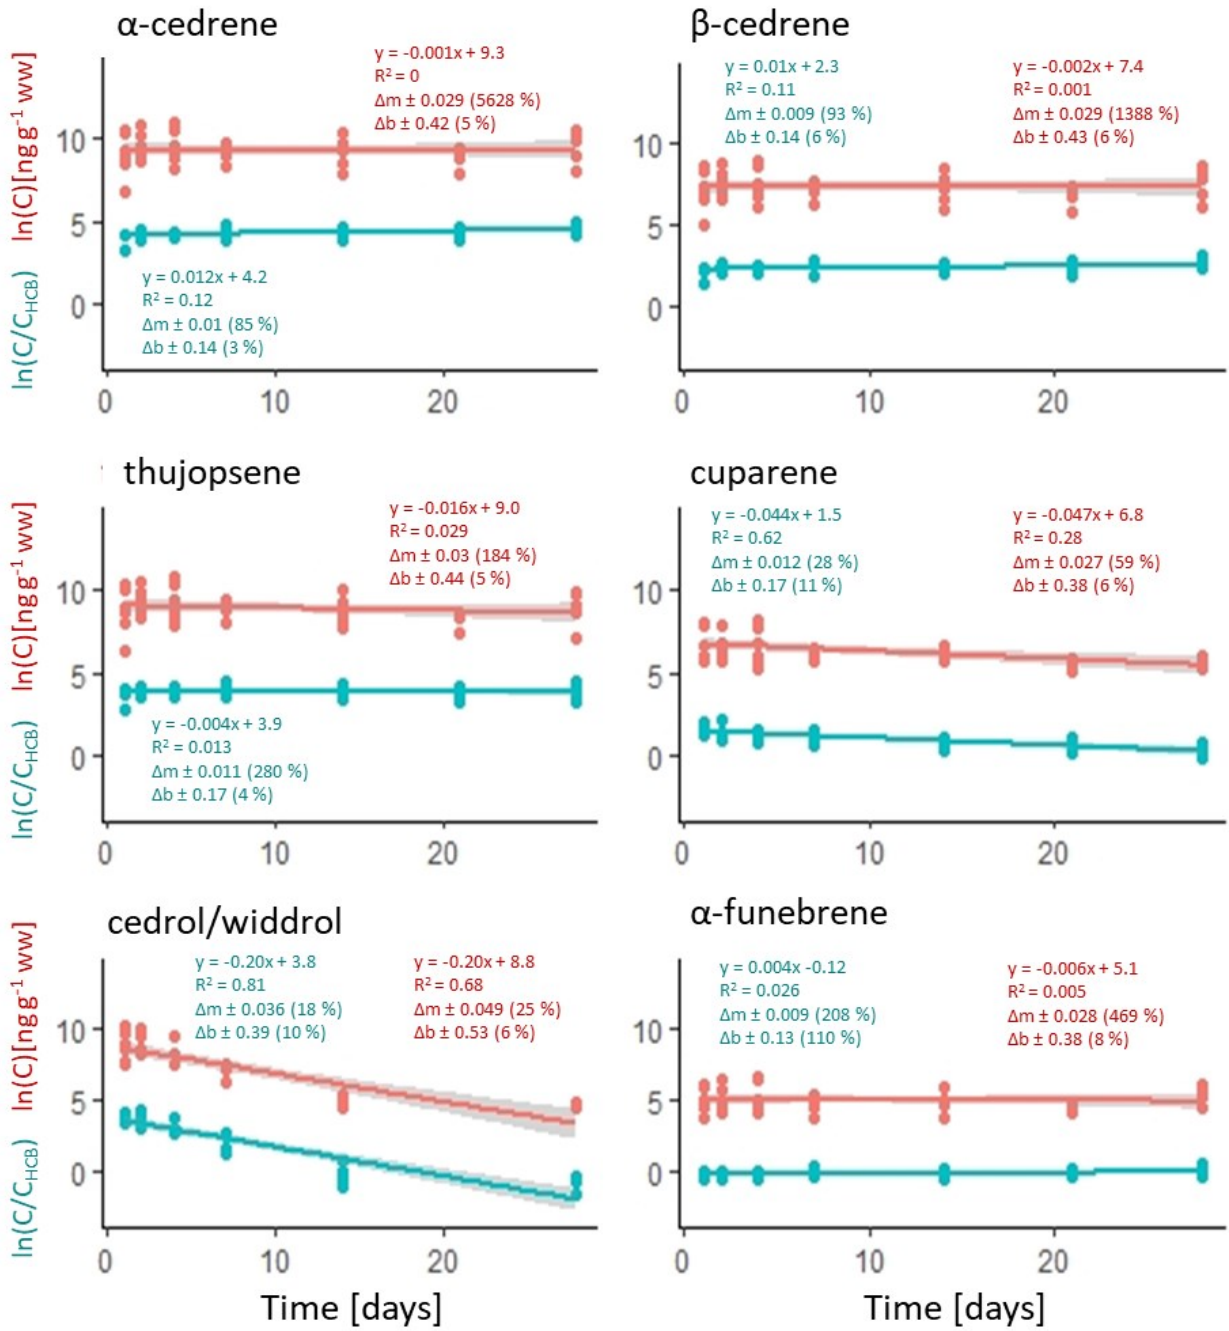

**Figure S5.** Threshold benchmarked depuration kinetics for the main Cedarwood oil constituents plotted as the natural logarithm (ln) of the measured target analyte concentrations [ $\text{ng g}^{-1} \text{ww}$ ] (orange) and the ln target analyte concentrations threshold benchmarked with PeCB (blue) against the time [days].

**Table S4.**  $k_T$  [ $d^{-1}$ ] and  $k_{TG}$  [ $d^{-1}$ ]  $\pm 1.96 \times SE$  (5<sup>th</sup> and 95<sup>th</sup> percentile) benchmarked with HCB for the main Cedarwood oil components and BMs.

| Name                | $k_T$              | $k_{TG}$          |
|---------------------|--------------------|-------------------|
| $\alpha$ -Cedrene   | 0.001 $\pm$ 0.029  | 0.013 $\pm$ 0.007 |
| $\beta$ -Cedrene    | 0.002 $\pm$ 0.029  | 0.015 $\pm$ 0.008 |
| Thujopsene          | 0.016 $\pm$ 0.030  | 0.029 $\pm$ 0.009 |
| Cuparene            | 0.047 $\pm$ 0.027  | 0.067 $\pm$ 0.013 |
| Cedrol/Widdrol      | 0.20 $\pm$ 0.049   | 0.23 $\pm$ 0.036  |
| $\alpha$ -Funebrene | 0.006 $\pm$ 0.028  | 0.02 $\pm$ 0.011  |
| <b>BMs</b>          |                    |                   |
| TrCB                | 0.17 $\pm$ 0.053   | 0.19 $\pm$ 0.053  |
| PeCB                | 0.012 $\pm$ 0.028  | 0.025 $\pm$ 0.012 |
| HCB                 | -0.013 $\pm$ 0.024 | n.a.              |

## 4. $k_M$ prediction in R

### 4.1 Input data

Data on  $k_{TG}$  and  $\log K_{OW}$  for the target Cedarwood oil constituents as well as benchmark substances were loaded as two separate data frames called “df” and “ref”, respectively.

```
df <- as.data.frame(CWO_ktg)
ref <- as.data.frame(referenceCWO_ktg)
```

### 4.2 Linear regression

The chosen benchmark substances are assumed to be eliminated via gills ( $k_2$ ) and growth-dilution ( $k_G$ ) only. The growth-corrected ( $k_{TG(BM)}$ ) of the benchmark substances therefore equals ( $k_2$ ) of the benchmark substances.

$$k_2 \text{ is defined as } k_2 = \frac{E_w * G_v}{L_B * W_B * K_{OW}} = k_{TG(BM)}$$

where  $E_w$  is the chemical transfer efficiency at the gill [unitless],  $G_v$  is the gill ventilation rate [ $l d^{-1}$ ],  $W_B$  is the wet weight of the fish [kg],  $L_B$  is the lipid content of the fish [kg lipid/kg fish], and  $K_{OW}$  is the octanol-water partitioning coefficient of the target analyte (Gobas & Morrison, 2000).

$$E_w * G_v \text{ and } L_B * W_B \ll K_{OW}.$$

$$\text{Therefore, } k_{TG(BM)} \rightarrow \frac{1}{K_{OW}}, \text{ or } \text{Log}k_{TG(BM)} \sim \text{Log}K_{OW}.$$

The linear regression model for  $\text{Log}k_{TG(BM)} \sim \text{Log}K_{OW}$  can be fitted with

```
pred_logkTG = lm(logkTG ~ logKOW, data = ref)
```

with

```
summary(pred_logkTG)
```

```
##
## Call:
## lm(formula = logkTG ~ logKOW, data = ref)
##
## Residuals:
##      1      2      3      4
## 0.142556 0.002634 0.073779 -0.218969
##
## Coefficients:
##              Estimate Std. Error t value Pr(>|t|)
## (Intercept)  1.6740      0.7429   2.253  0.1530
## logKOW      -0.6342      0.1509  -4.203  0.0522 .
## ---
## Signif. codes:  0 '***' 0.001 '**' 0.01 '*' 0.05 '.' 0.1 ' ' 1
##
## Residual standard error: 0.192 on 2 degrees of freedom
## Multiple R-squared:  0.8983, Adjusted R-squared:  0.8475
## F-statistic: 17.67 on 1 and 2 DF, p-value: 0.05221
```

#### 4.3 Predicting the diffusion based (gill) elimination rate of the target analytes

The fitted linear relationship between  $\text{Log}k_{TG(BM)}$  and  $\text{Log}K_{OW}$  can be used to calculate the diffusion based (gill) elimination rate ( $k_2$ ) for the target analytes at a 95% confidence level:

```
kx_log <- predict(pred_logkTG, df, interval = "prediction", level = 0.95)
```

The predicted  $k_2$  for the target analytes can then be used to calculate  $k_M$  for the respective target analytes, based on

$$k_M = k_{TG} - k_2$$

```
pred_log <- as.data.frame(kx_log) # transforming the predicted k2 into a
dataframe to be able to merge it with the kTG dataset
```

```
all_log <- cbind(df, pred_log) # add the predicted logarithmic k2 values
(median, 5th and 95th percentile) as a new column to the kTG dataset
```

```
trans_kx <- as.data.frame(10^all_log$fit) # transform to non-Logarithmic
```

```
colnames(trans_kx) <- "predicted kx" #set the column names
```

```
all_trans <- cbind(all_log, trans_kx) # add median k2 column to the
all_log dataframe
```

```
calc_trans <- as.data.frame(all_trans$kTG - all_trans$`predicted kx`) #  
calculate kM
```

The resulting  $k_M$  of the target analytes are

```
kM_trans <- cbind(all_log$Chemical, calc_trans) # create a new dataframe  
with the chemical names and kM values  
colnames(kM_trans) <- c("Chemical", "kM") # set the column names  
kM_trans # display the dataframe
```

```
## Chemical      kM  
## 1      aCed 0.00219009  
## 2      bCed 0.00538194  
## 3       Thu 0.02279370  
## 4       Cup 0.06139675  
## 5       CDL 0.14527350  
## 6      aFun 0.00919009
```

## References

- Annot JA, Gobas FAPC. 2004. A food web bioaccumulation model for organic chemicals in aquatic ecosystems. *Environ. Toxicol. Chem.* 23 (10): 2343–2355.
- Annot, J. A.; Mackay, D.; Bonnell, M., Estimating metabolic biotransformation rates in fish from laboratory data. *Environmental Toxicology and Chemistry* 2008, 27, (2), 341-351.
- Chen CEL, Lofstrand K, Adolffson-Erici M, McLachlan M, MacLeod M. 2018. Deriving in Vivo Bioconcentration Factors of a Mixture of Fragrance Ingredients Using a Single Dietary Exposure and Internal Benchmarking. *Environ. Sci. Technol.* 2018, 52, 5227–5235.
- Crookes and Brooke. 2011. Estimation of fish bioconcentration factor (BCF) from depuration data. Environment Agency. ISBN: 978-1-84911-237-6.
- Gobas, F. A. P. C.; Mackay, D. 1987. Dynamics of Hydrophobic Organic-Chemical Bioconcentration in Fish. *Environ. Toxicol. Chem.*, 6 (7), 495–504.
- Gobas FAPC, Morrison HA. 2000. Bioconcentration and Biomagnification in the Aquatic Environment. In: Boethling & Mackay 2000. *Handbook of Environmental and Health Sciences- Property Estimation Methods for Chemicals*. Taylor and Francis Group, LLC. ISBN: 978-1-4200-2628-3. Page 203.
- OECD, Test No. 305: Bioaccumulation in Fish: Aqueous and Dietary Exposure; OECD Publishing: Paris, 2012; p 72.
- Images of chemical structures were obtained from the Chemspider website:  
 $\alpha$ -Funebrene: CSID:21170410, <http://www.chemspider.com/Chemical-Structure.21170410.html>  
(accessed 12:12, May 26, 2020)



$\alpha$ -Cedrene: CSID:4936353, <http://www.chemspider.com/Chemical-Structure.4936353.html>  
(accessed 12:03, May 26, 2020)

$\beta$ -Cedrene: CSID:9281621, <http://www.chemspider.com/Chemical-Structure.9281621.html>  
(accessed 12:09, May 26, 2020)

Thujopsene: CSID:390845, <http://www.chemspider.com/Chemical-Structure.390845.html> (accessed  
12:14, May 26, 2020)

Cuparene: CSID:78392, <http://www.chemspider.com/Chemical-Structure.78392.html> (accessed  
12:16, May 26, 2020)

Cedrol: CSID:59018, <http://www.chemspider.com/Chemical-Structure.59018.html> (accessed 12:17,  
May 26, 2020)

Widdrol: CSID:85136, <http://www.chemspider.com/Chemical-Structure.85136.html> (accessed 12:19,  
May 26, 2020)

Trichlorobenzene: CSID:7662, <http://www.chemspider.com/Chemical-Structure.7662.html> (accessed  
12:23, May 26, 2020)

Pentachlorobenzene: CSID:21106570, <http://www.chemspider.com/Chemical-Structure.21106570.html> (accessed 12:27, May 26, 2020)

Hexachlorobenzene: CSID:8067, <http://www.chemspider.com/Chemical-Structure.8067.html>  
(accessed 12:28, May 26, 2020)

2,2',5,6'-PCB: CSID:35581, <http://www.chemspider.com/Chemical-Structure.35581.html> (accessed  
12:29, May 26, 2020)
